# Supplementary material
Source: PubMed Central journal article supplement (PMC3512013)
Supplement: supp_en.2012-1308_1308_Supplemental_Fig_1.pdf [file supp_en.2012-1308_1308_Supplemental_Fig_1.pdf]

## EF1 $\alpha$ mRNA level

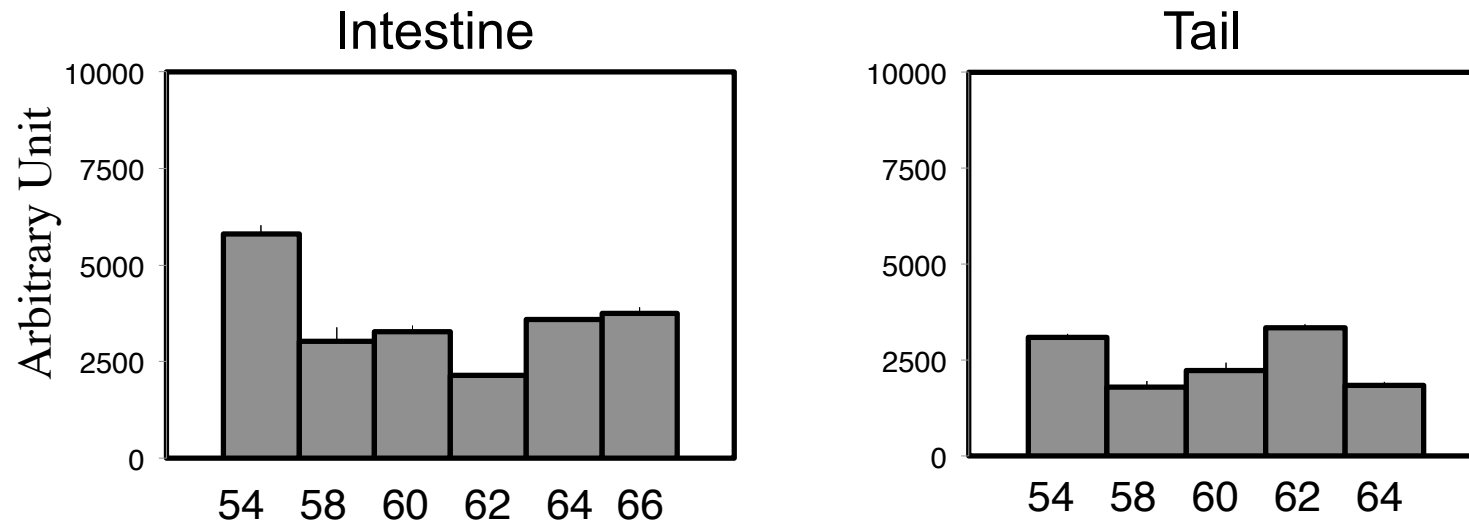

**Supplemental Fig. 1.** Relative expression levels of EF1 $\alpha$  in the intestine and tail during natural metamorphosis. Total RNA was isolated from the intestine and tail of *Xenopus tropicalis* tadpoles at the indicated stages and qRT-PCR was carried out to determine the expression of EF1 $\alpha$ . Error bars indicate s.e.m. (n=3).
